# Supplementary material
Source: PubMed Central journal article supplement (PMC4132584)
Supplement: Supp_Figure2.pdf [file Supp_Figure2.pdf]

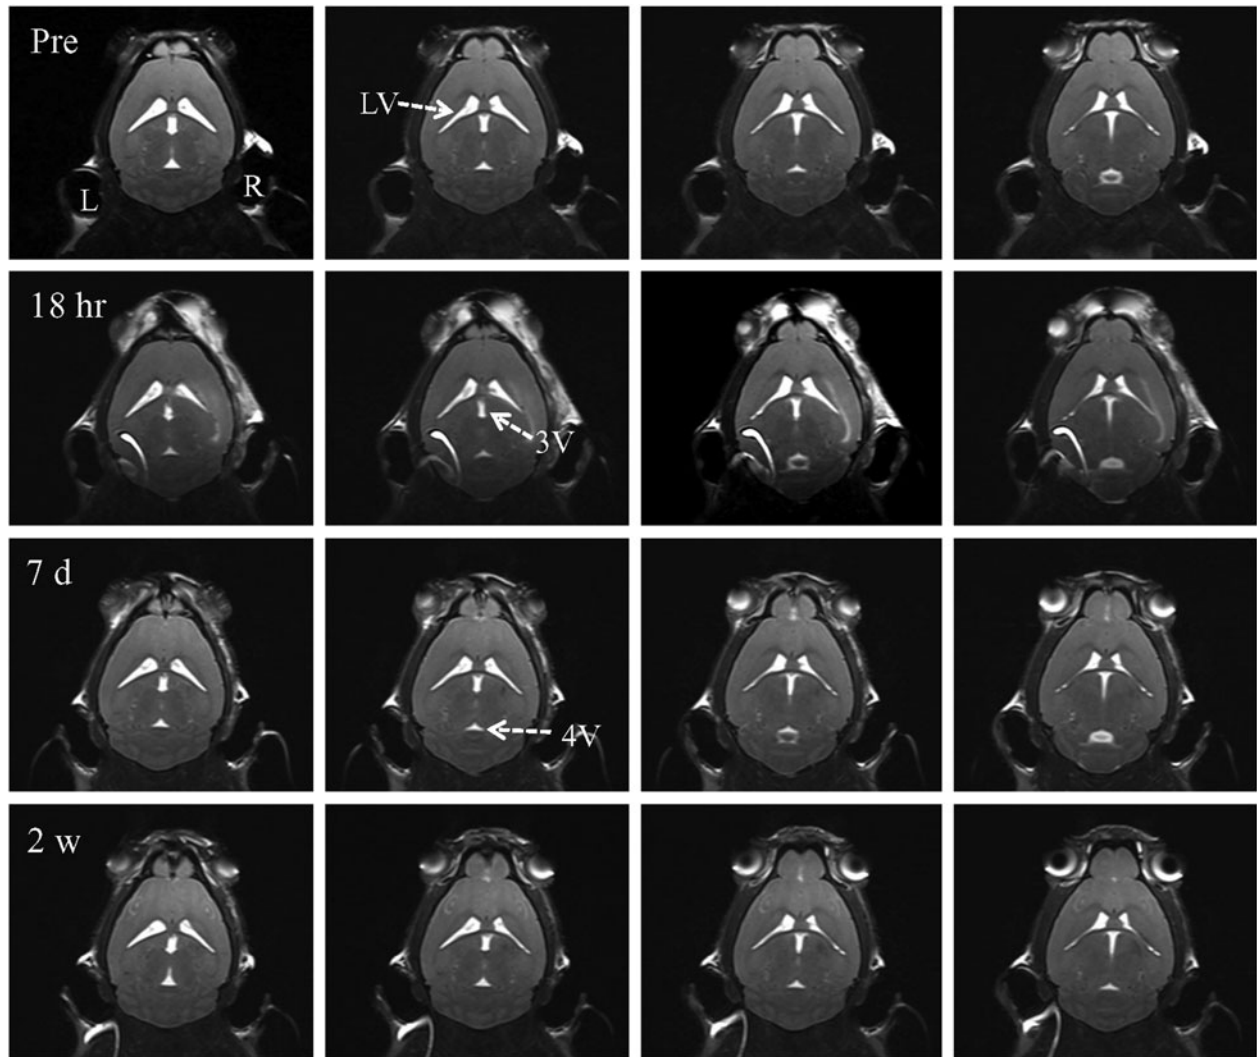

**SUPPLEMENTARY FIG. S2.** Magnetic resonance images showing ventricles at different time points after lateral fluid percussion injury (LFPI). A representative LFPI mouse was imaged before and then subsequently followed for 2 weeks after LFPI. Four coronal sections are shown at each time point. LV, lateral ventricle; 3V, third ventricle; 4V, fourth ventricle; L, left side; R, right side.
